# Supplementary material for: Highly active MnOx–CeO2catalyst for diesel soot combustion
Source: Royal Society of Chemistry journal article supplement (doi:10.1039/c6ra25738k), 2017-01-01
Supplement: c6ra25738k1.pdf [file c6ra25738k1.pdf]

## Supporting Information

### Highly active MnO<sub>x</sub>-CeO<sub>2</sub> catalyst for diesel soot combustion

Han Zhao,<sup>1,2</sup> Xiaoxia Zhou,<sup>1</sup> Min Wang,<sup>1,2</sup> Zhiguo Xie,<sup>1</sup> Hangrong Chen<sup>\*,1,3</sup> and Jianlin Shi<sup>1,3</sup>

<sup>1</sup> *State Key Laboratory of High Performance Ceramics and Superfine Microstructures, Shanghai*

*Institute of Ceramics, Chinese Academy of Sciences, 1295 Dingxi Road, Shanghai 200050, China.*

<sup>2</sup> *University of Chinese Academy of Sciences, Beijing, 100049, P. R. China.*

<sup>3</sup> *Jiangsu National Synergetic Innovation Center for Advanced Materials (SICAM), Jiangsu, China.*

\* Corresponding Author: Hangrong Chen (*Email address: hrchen@mail.sic.ac.cn*)

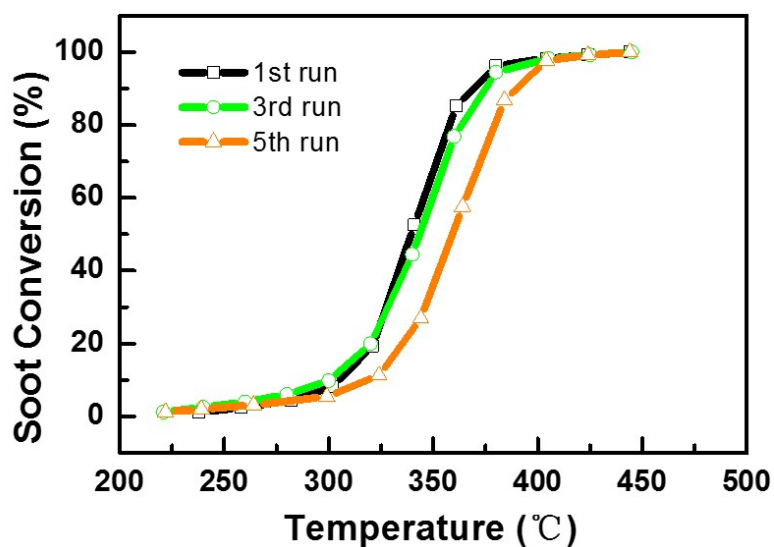

**Fig. S1** The cycle catalytic oxidation of soot over  $\text{CM}_{33}$  using a different mixing method: “wet mixing”.

[Note that contrary to the mixing method used in the main text (designated as “dry mixing”), the “wet mixing” method was introduced to ensure the repeatability of contact condition between soot and the “spent catalyst” during the cycle experiments, which was conducted as follows: soot (10 mg) and catalyst (100 mg) were thoroughly dispersed in ethanol by ultrasonic for 20 min, then dried at 150°C and eventually mixed with silica pellets (1g) for 10 min with a spatula.]

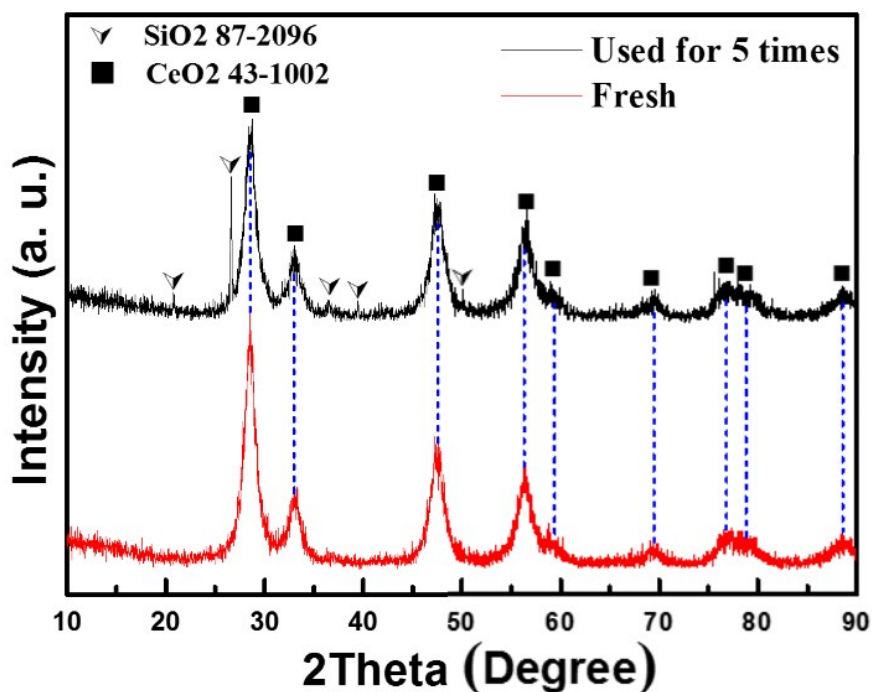

**Fig. S2** The XRD patterns of the  $\text{CM}_{33}$  before and after cycle test.

[Note that the diffraction peaks corresponding to  $\text{SiO}_2$  were derived from the residual silica which was added to the catalyst-soot mixture during the activity test.]

**Table S1** Temperatures of soot combustion over catalysts or without catalysts (loose contact mode). NG: not given.

| Catalysts                                                                  | T <sub>m</sub><br>(°C) | T <sub>f</sub><br>(°C) | Space<br>velocity<br>[mL/(g <sub>catal</sub> ·h)] | Reactant<br>gases                                | Mass ratio of<br>soot/catalyst | Ref.         |
|----------------------------------------------------------------------------|------------------------|------------------------|---------------------------------------------------|--------------------------------------------------|--------------------------------|--------------|
| Au <sub>0.06</sub> /LaFeO <sub>3</sub>                                     | 366                    | NG                     | 30,000                                            | 5% O <sub>2</sub> / 0.2%<br>NO/ Ar               | 1:10                           | 23           |
| Ag/CeO <sub>x</sub> /FeO <sub>y</sub> /<br>cordierite                      | 334                    | 400                    | NG                                                | 20% O <sub>2</sub> / 80%<br>N <sub>2</sub>       | 1:9                            | 25           |
| Ba/MnO <sub>x</sub> -CeO <sub>2</sub>                                      | 393                    | NG                     | 300,000                                           | 10% O <sub>2</sub> / 0.1%<br>NO/ N <sub>2</sub>  | 1:10                           | 10           |
| MnO <sub>x</sub> -CeO <sub>2</sub>                                         | 400                    | NG                     | 300,000                                           | 10% O <sub>2</sub> / 0.1%<br>NO/ N <sub>2</sub>  | 1:10                           | 31           |
| MnO <sub>x</sub> -CeO <sub>2</sub>                                         | 413                    | >510                   | NG                                                | 10% O <sub>2</sub> / 0.1%<br>NO/ He              | 1:9                            | 32           |
| Pt/MnO <sub>x</sub> -CeO <sub>2</sub>                                      | 420                    | NG                     | 330,000                                           | 10% O <sub>2</sub> /<br>0.08% NO/ Ar             | 1:10                           | 33           |
| MnO <sub>x</sub> -CeO <sub>2</sub>                                         | 418                    | NG                     | 300,000                                           | 10% O <sub>2</sub> / 0.1%<br>NO/ N <sub>2</sub>  | 1:10                           | 34           |
| CuO <sub>x</sub> -CeO <sub>2</sub> /<br>ZrO <sub>2</sub> -TiO <sub>2</sub> | 350                    | 404                    | 90,000                                            | 10% O <sub>2</sub> /<br>0.05% NO/ N <sub>2</sub> | 1:10                           | 20           |
| CM <sub>20</sub>                                                           | 326                    | 360                    | 120,000                                           | 10% O <sub>2</sub> /<br>0.05% NO/ N <sub>2</sub> | 1:10                           | This<br>work |
| CM <sub>20</sub>                                                           | 350                    | 392                    | 330,000                                           | 10% O <sub>2</sub> /<br>0.05% NO/ N <sub>2</sub> | 1:10                           | This<br>work |
| NULL                                                                       | 560                    | 606                    | 120,000                                           | 10% O <sub>2</sub> /<br>0.05% NO/ N <sub>2</sub> | 1:10                           | This<br>work |

[Note that due to a lack of standard measurement procedure, it is really hard to find data measured under totally identical conditions, nevertheless, we have tried our best to keep constant such key factors as contact mode (loose instead of tight), gas species [O<sub>2</sub> (and NO), balanced with inert gas, without H<sub>2</sub>S or H<sub>2</sub>O] and the mass ratio of soot/catalyst (1:10 or 1:9).]

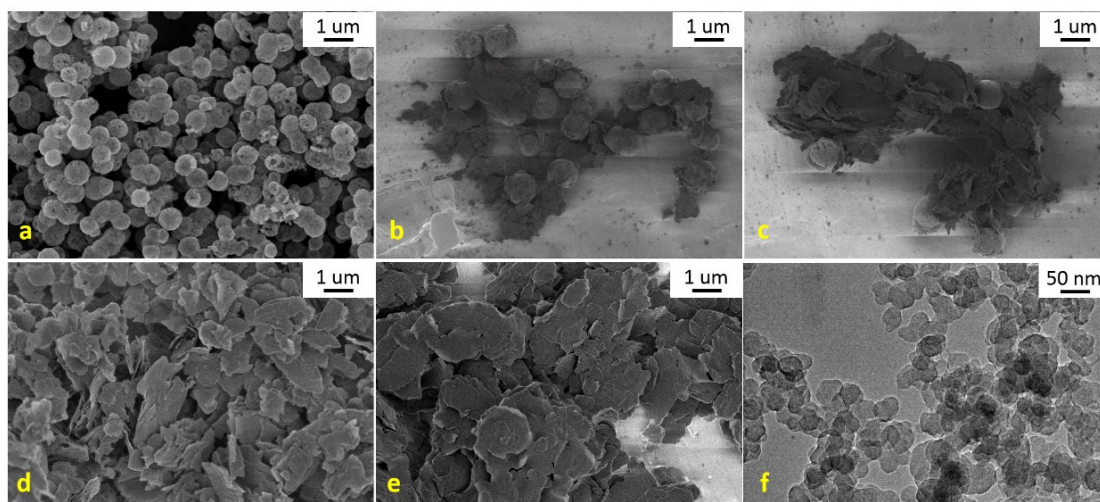

**Fig. S3** SEM images of  $\text{MnO}_x$  (a),  $\text{CM}_{66}$  (b),  $\text{CM}_{50}$  (c),  $\text{CM}_5$  (d), and  $\text{CeO}_2$  (e); TEM image of soot (f).

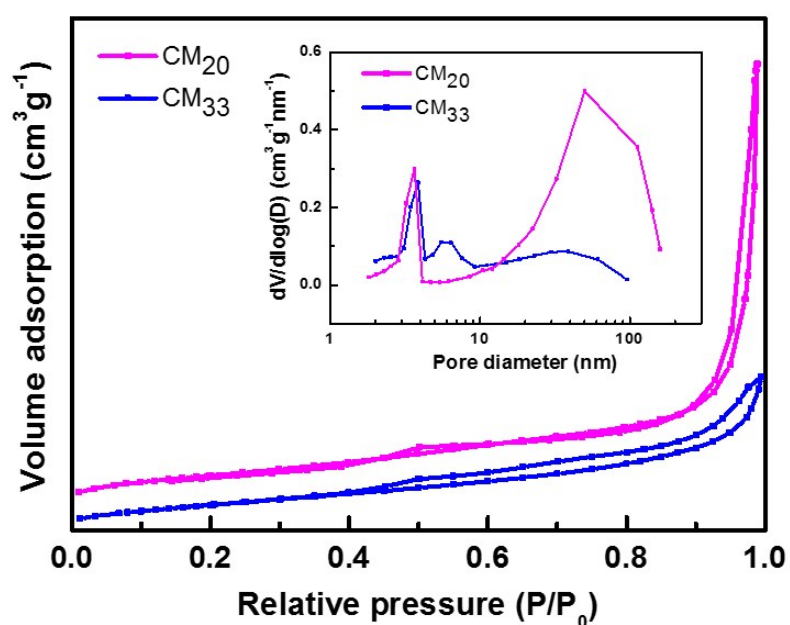

**Fig. S4**  $\text{N}_2$  adsorption/desorption isotherms and the inset corresponding pore size distributions of  $\text{CM}_{20}$  and  $\text{CM}_{33}$ .

**Table S2** Specific surface areas, pore volumes and the pore sizes of all MnO<sub>x</sub>-CeO<sub>2</sub> composites and the reference MnO<sub>x</sub> and CeO<sub>2</sub>.

| Catalyst         | S <sub>BET</sub> <sup>a</sup> (m <sup>2</sup> g <sup>-1</sup> ) | V <sub>BJH</sub> <sup>b</sup> (cm <sup>3</sup> g <sup>-1</sup> ) | D <sub>p</sub> <sup>c</sup> (nm) |
|------------------|-----------------------------------------------------------------|------------------------------------------------------------------|----------------------------------|
| MnO <sub>x</sub> | 20.7                                                            | 0.22                                                             | 33                               |
| CM <sub>66</sub> | 72.2                                                            | 0.21                                                             | 8-27                             |
| CM <sub>50</sub> | 52.8                                                            | 0.11                                                             | 3-9                              |
| CM <sub>33</sub> | 75.3                                                            | 0.15                                                             | 6, 13-67                         |
| CM <sub>20</sub> | 73.6                                                            | 0.38                                                             | 25-144                           |
| CM <sub>5</sub>  | 34.0                                                            | 0.12                                                             | 24-156                           |
| CeO <sub>2</sub> | 31.1                                                            | 0.08                                                             | 4-43                             |

<sup>a</sup> determined by BET method;

<sup>b</sup> BJH Desorption Cumulative Pore Volume of pores between 17.000000 and 3000.000000 Å Diameter;

<sup>c</sup> BJH Desorption Average Pore Diameter (4V/A).

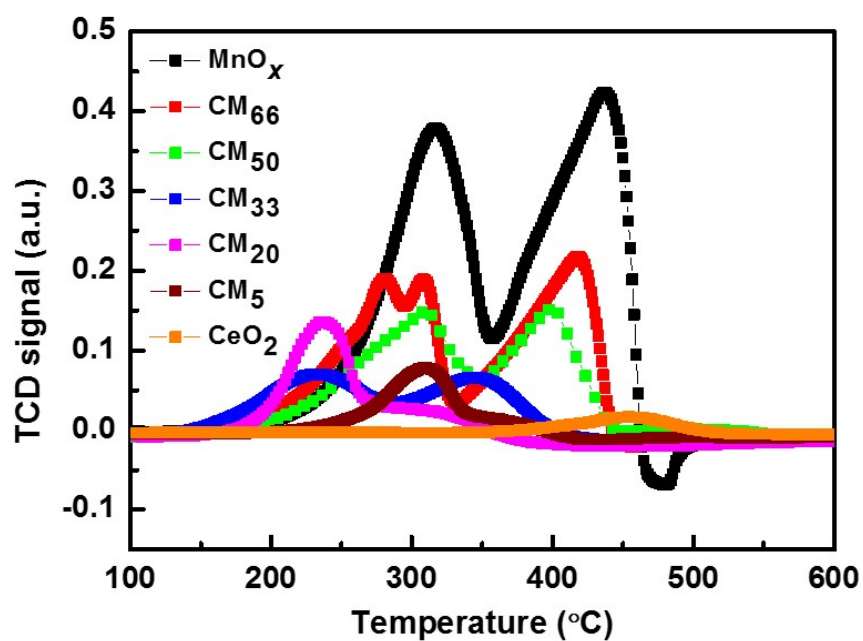

**Fig. S5** H<sub>2</sub>-TPR curves of all MnO<sub>x</sub>-CeO<sub>2</sub> composites and the reference MnO<sub>x</sub> and CeO<sub>2</sub>.

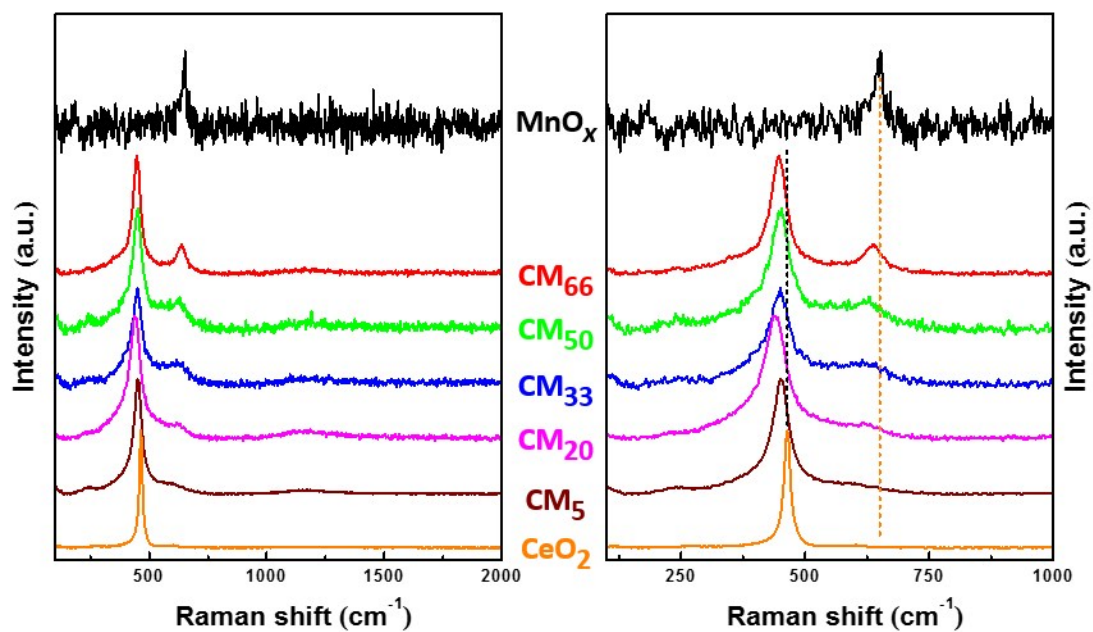

**Fig. S6** Raman spectra over all  $\text{MnO}_x\text{-CeO}_2$  composites and the reference  $\text{MnO}_x$  and  $\text{CeO}_2$ . Left: Raman spectra in a wide range; Right: The corresponding Raman spectra in a narrow range.

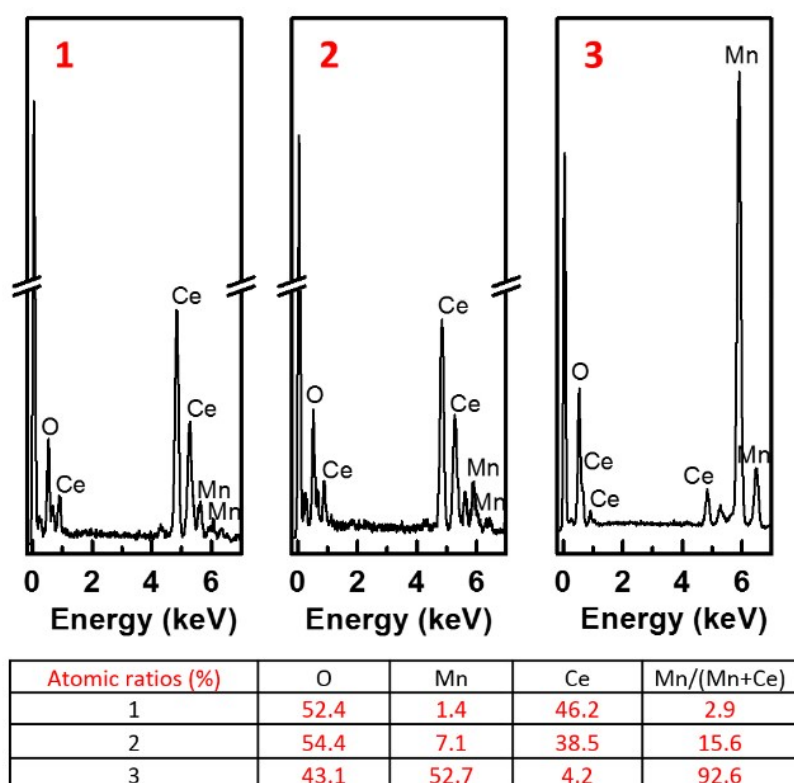

**Fig. S7** SEM-EDS results of different areas in  $\text{CM}_{33}$ .

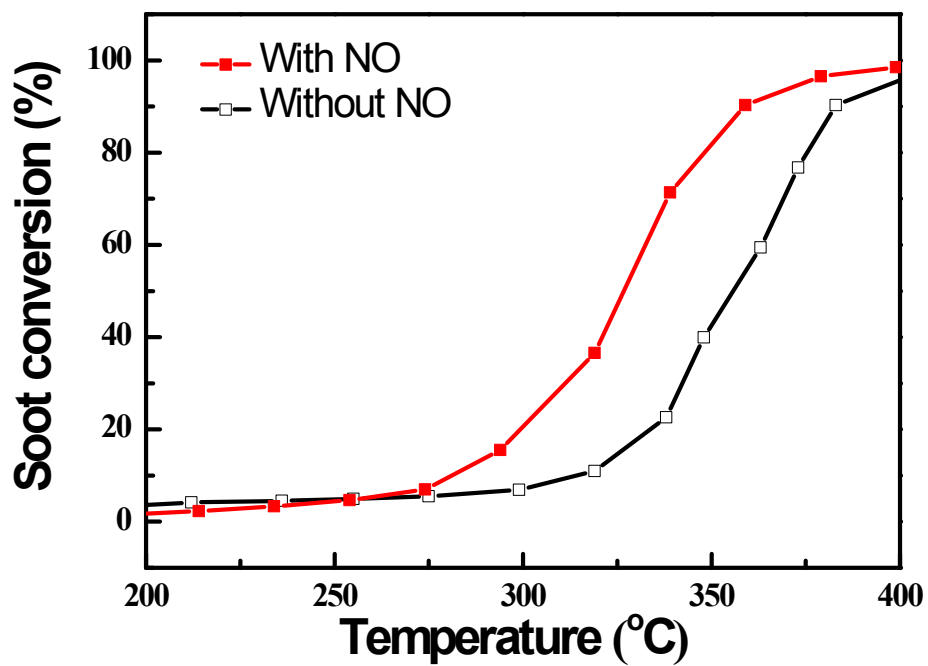

**Fig. S8** Temperature-programed soot oxidation experiments over  $CM_{20}$  with or without NO existing in the feed gas.
